# Supplementary material
Source: HighWire-hosted journal article supplement (http://www.cfp.ca/highwire/filestream/30458/field_highwire_adjunct_files/0/DAPT_trial_summary.pdf)

## DAPT: 12 vs 30 Months of Dual AntiPlatelet Therapy after Drug-Eluting Stents<sup>1</sup>

### BOTTOM LINE

- In **DAPT**, a group of highly selected patients 56% excluded at randomization who received a **drug-eluting stent (DES)** 27% paclitaxel & dual antiplatelet therapy (DAPT, i.e. ASA + thienopyridine) beyond 1 year (30 months in total) had:
  - ↓ risk of stent thrombosis (NNT=100) and ↓ risk major adverse cardiovascular & cerebrovascular event (MACCE) (NNT=63) but ↑ risk of moderate-severe bleeding (NNH=112)
  - ↑ risk of all-cause mortality trend at 30 months, statistically significant at 33 months, NNH=200 (primarily driven by non-cardiovascular death)
- The ideal duration of DAPT therapy is still unknown. Extended DAPT therapy may be of most benefit in those who are at a very high risk of ischemic events & low risk of bleeding; however, high risk patients were excluded from **DAPT** (randomization phase).

### BACKGROUND<sup>1,2,3,4,5,6,7,8,9</sup>

- DAPT is recommended after bare-metal stent (BMS) & DES placement to ↓ the risk of stent thrombosis & MACCE.
- Compared to BMS, DES ↓ the risk of restenosis & the need for target vessel revascularization procedures; however, DES may ↑ the risk of stent thrombosis, depending on the type:
  - 1<sup>st</sup> generation DES (G<sub>1</sub>DES; paclitaxel, sirolimus): ↑ risk of very late stent thrombosis (i.e. >1 year after PCI) compared to BMS.
  - Newer generation DES (e.g. everolimus, zotarolimus): similar rate of very late stent thrombosis as BMS.
- The **Canadian Cardiovascular Society 2012 Antiplatelet Guidelines** recommend DAPT x 12 months after a coronary stent has been inserted. The committee also suggests that DAPT may be continued beyond 12 months in patients who have a high risk of thrombosis & a low bleeding risk (conditional recommendation, low-quality evidence).<sup>4</sup>
- Several other clinical practice guidelines make similar statements with extended DAPT, which is based on observational studies that suggested DAPT beyond 1 year ↓ the risk of very late stent thrombosis with G<sub>1</sub>DES.<sup>5,6,7</sup> The Food & Drug Administration (FDA) requested that a large randomized controlled trial be conducted to address this issue.
- Three randomized controlled trials have evaluated extended vs standard (12 months) DAPT – **DES-LATE**, **ARTIC-Interruption**, **DAPT**. All three studies excluded patients with a high thrombosis or bleed risk. Patients could only be randomized to extended DAPT if they were 'event-free' after 12 months of DAPT (i.e. no major adverse cardiac or cerebrovascular events, or major bleeding).
  - ARTIC-Interruption** (2014, France):<sup>8</sup> n=1,259 patients with DES (~40% G<sub>1</sub>DES), open-label DAPT x 12 months vs 18 to 30 months (90% clopidogrel, 10% prasugrel). Primary endpoint (death, MI, stent thrombosis, stroke or urgent revascularization): NS. Major bleeding (STEEPLE): NS; major & minor bleeding: ↑ risk with extended DAPT, NNH=100
  - DES-LATE** (2014, Korea):<sup>9</sup> n=5,045 patients with DES (~64% G<sub>1</sub>DES), open-label DAPT 12 months vs 36 months (100% clopidogrel). Primary endpoint (death from CV causes, MI, stroke): NS; stent thrombosis: NS. Major bleeding (TIMI): NS
- Of note, because very late stent thrombosis is rare (0.3% with G<sub>1</sub>DES, 0.04% with newer generation DES), it is estimated that approximately 10,000 individuals would need to be recruited in order to evaluate extended DAPT for this outcome.

### TRIAL BACKGROUND<sup>1,2</sup>

**DESIGN:** international 11 countries, multi-centre 452 sites, prospective, open-label followed by a randomized, double-blinded, placebo controlled trial. ITT & superiority for efficacy outcomes. Concealed allocation. Funding: 8 stent and pharmaceutical manufacturers, including the manufacturers of clopidogrel (Bristol Myers Squibb, Sanofi) and prasugrel (Eli Lilly), & the Harvard Clinical Research Institute. Enrolment period: August 2009 - July 2011.

**INTERVENTION:** DAPT (ASA + P2Y<sub>12</sub> receptor inhibitor) 12 months vs 30 months

- Enrollment:** all participants received open-label DAPT x 12 months (months 0-12)
  - ASA 75-325mg daily x 6 months, then 75-162mg daily + clopidogrel 300-600mg x 1, then 75mg daily, or + prasugrel 60mg x 1, then 5-10mg daily (5mg daily if <60kg)
- Randomization:** eligible patients were randomized to DAPT or placebo + ASA x 18 months (months 12-30)
- Observational follow-up:** open-label ASA only x 3 months (months 30-33)
- Stent type, choice of thienopyridine, and dose of ASA was left to the discretion of the clinician overseeing care.
- INCLUSION: Enrollment:** age >18 years, undergoing PCI with DES or BMS stent (only DES data presented here)
- Randomization:** "12 Month Clear" i.e. DAPT x 12 months, event free (i.e. no death, MI, stroke, repeat coronary revascularization, stent thrombosis, & moderate or severe GUSTO bleeding) and adherent to therapy (80-120% of doses during months 0-6 and without interruption of therapy >14 days during months 6-12)

### EXCLUSION:

- Enrollment:** stent diameter <2.25 or >4.0mm, pregnant women, planned surgery requiring discontinuation (>14 days) of antiplatelet therapy within 30 months post PCI, current medical condition with a life expectancy <3 years, on warfarin or similar anticoagulant, treated with both DES and BMS
- Randomization:** switched thienopyridine type or dose within 6 months before randomization, PCI or cardiac surgery between 6 weeks post-index procedure and randomization, planned surgery requiring the discontinuation (>14 days) of antiplatelet therapy within 21 months after randomization

**POPULATION** at randomization: n=9961 of 22,866 who received a DES

- mean age ~62 years, ~75% ♂, 88% Caucasian, 89.5% from North America
- mean body weight 91.5kg (±19.5kg), BMI 30.5kg/m<sup>2</sup> (±5.8kg/m<sup>2</sup>)
- 75% HTN 75.8% DAPT vs 74% placebo + ASA, p=0.03, 30.6% DM, ~25% smoker current or within past year, ~22% MI, ~3% stroke/TIA, ~5% HF, ~6% PAD
- ~30% prior PCI, ~11.5% prior CABG, ~51% had risk factor(s) for stent thrombosis e.g. STEMI, NSTEMI, renal failure, LVEF<30%, >2 vessels stented, etc
- Indication for PCI:** ~38% stable angina, ~20% "other", ~17% unstable angina, 15.5% NSTEMI, ~10.5% STEMI
- Type of thienopyridine:** ~65% clopidogrel, ~35% prasugrel; 22% were on a proton-pump inhibitor at randomization<sup>3</sup>
- Type of DES:** ~47% everolimus, ~27% paclitaxel, ~13% zotarolimus, ~11% sirolimus & 2% >1 type
- Mean number: treated lesions 1.3, treated vessels 1, stents 1.5, stent length 27.5mm
- 53% stent diameter ≥3mm, 97% native coronary artery lesions (~40% left anterior descending), 43% modified ACC-AHA lesion B2 or C

**RESULTS**

follow-up: 30 and 33 months

**TABLE 1: EFFICACY & SAFETY**

| PRIMARY ANALYSIS PERIOD: ITT & superiority                                                         |                                                |                         |                               |                                 |                      |                                                                                                                                                                                                                                                                                                                                                                                                                                                                                                                                                                                                                                                                                                                                                                                                                            |  |
|----------------------------------------------------------------------------------------------------|------------------------------------------------|-------------------------|-------------------------------|---------------------------------|----------------------|----------------------------------------------------------------------------------------------------------------------------------------------------------------------------------------------------------------------------------------------------------------------------------------------------------------------------------------------------------------------------------------------------------------------------------------------------------------------------------------------------------------------------------------------------------------------------------------------------------------------------------------------------------------------------------------------------------------------------------------------------------------------------------------------------------------------------|--|
| CLINICAL ENDPOINTS                                                                                 | DAPT<br>n=5020                                 | PLACEBO + ASA<br>n=4941 | HAZARD RATIO<br>(95% CI)      | P-VALUE                         | NNT/NNH              | COMMENTS                                                                                                                                                                                                                                                                                                                                                                                                                                                                                                                                                                                                                                                                                                                                                                                                                   |  |
| <b>CO-PRIMARY EFFICACY ENDPOINTS</b>                                                               |                                                |                         |                               |                                 |                      |                                                                                                                                                                                                                                                                                                                                                                                                                                                                                                                                                                                                                                                                                                                                                                                                                            |  |
| Stent thrombosis                                                                                   | 0.4%                                           | 1.4%                    | 0.29 (0.17-0.48)              | <0.001                          | 100/30 MONTHS        | - <b>MACCE</b> rates primarily driven by MI<br>- <b>MI not related to stent thrombosis:</b> DAPT 1.8% vs placebo + ASA 2.9%, HR 0.59, p<0.001<br>- <b>All-cause mortality</b> was primarily driven by non-cardiovascular death<br>- <b>Cancer-related deaths</b> DAPT n=31 vs placebo + ASA n= 14, p=0.02<br>- <b>Discontinuation Rate:</b> DAPT 21.4% vs placebo + ASA 20.3%, NS<br><br>Events 3 Months After Discontinuing DAPT: *<br>DAPT Arm (last 3 months of tx vs 3 months after)<br>- Stent thrombosis: HR 0.12 (0.01-0.22) → 0.31 (0.13-0.50)<br>- MACCE: HR 0.8 (0.53-1.07) → 1.59 (1.2-2)<br>- MI: HR 0.43 (0.23-0.63) → 1.12 (0.8-1.5)<br><br>DAPT vs Placebo + ASA (months 12-15, p<0.001)<br>- Stent thrombosis: HR 0.05 (0.01-0.39)<br>- MACCE: HR 0.38 (0.25-0.59)<br>- MI: HR 0.24 (0.13-0.42)<br>*HR/day |  |
| MACCE (death, MI, stroke)                                                                          | 4.3%                                           | 5.9%                    | 0.71 (0.59-0.85)              |                                 | 63/30 MONTHS         |                                                                                                                                                                                                                                                                                                                                                                                                                                                                                                                                                                                                                                                                                                                                                                                                                            |  |
| <b>SECONDARY EFFICACY ENDPOINTS</b>                                                                |                                                |                         |                               |                                 |                      |                                                                                                                                                                                                                                                                                                                                                                                                                                                                                                                                                                                                                                                                                                                                                                                                                            |  |
| Myocardial Infarction                                                                              | 2.1%                                           | 4.1%                    | 0.47 (0.37-0.61)              | <0.001                          | 50/30 MONTHS         |                                                                                                                                                                                                                                                                                                                                                                                                                                                                                                                                                                                                                                                                                                                                                                                                                            |  |
| Stroke                                                                                             | 0.8%                                           | 0.9%                    | NS                            | 0.32                            | -                    |                                                                                                                                                                                                                                                                                                                                                                                                                                                                                                                                                                                                                                                                                                                                                                                                                            |  |
| All-Cause Mortality                                                                                | 2%                                             | 1.5%                    | 1.36 (1.00-1.85)              | 0.052                           | -                    |                                                                                                                                                                                                                                                                                                                                                                                                                                                                                                                                                                                                                                                                                                                                                                                                                            |  |
| <b>SECONDARY ANALYSIS PERIOD: ITT &amp; superiority</b>                                            |                                                |                         |                               |                                 |                      |                                                                                                                                                                                                                                                                                                                                                                                                                                                                                                                                                                                                                                                                                                                                                                                                                            |  |
| CLINICAL ENDPOINTS                                                                                 | DAPT x 30 MONTHS THEN ASA x 3 MONTHS<br>n=5020 | PLACEBO + ASA<br>n=4941 | HAZARD RATIO<br>(95% CI)      | P-VALUE                         | NNT/NNH              |                                                                                                                                                                                                                                                                                                                                                                                                                                                                                                                                                                                                                                                                                                                                                                                                                            |  |
| Stent thrombosis                                                                                   | 0.7%                                           | 1.4%                    | 0.45 (0.29-0.69)              | <0.001                          | 143/33 MONTHS        |                                                                                                                                                                                                                                                                                                                                                                                                                                                                                                                                                                                                                                                                                                                                                                                                                            |  |
| MACCE (death, MI, stroke)                                                                          | 5.6%                                           | 6.5%                    | 0.82 (0.7-0.97)               | 0.02                            | 112/33 MONTHS        |                                                                                                                                                                                                                                                                                                                                                                                                                                                                                                                                                                                                                                                                                                                                                                                                                            |  |
| Myocardial Infarction                                                                              | 3%                                             | 4.5%                    | 0.61 (0.49-0.76)              | <0.001                          | 67/33 MONTHS         |                                                                                                                                                                                                                                                                                                                                                                                                                                                                                                                                                                                                                                                                                                                                                                                                                            |  |
| Stroke                                                                                             | 1%                                             | 1.1%                    | NS                            | 0.48                            | -                    |                                                                                                                                                                                                                                                                                                                                                                                                                                                                                                                                                                                                                                                                                                                                                                                                                            |  |
| All-Cause Mortality                                                                                | 2.3%                                           | 1.8%                    | 1.36 (1.02-1.82)              | 0.04                            | 200/33 MONTHS        |                                                                                                                                                                                                                                                                                                                                                                                                                                                                                                                                                                                                                                                                                                                                                                                                                            |  |
| <b>PRIMARY SAFETY ENDPOINT: patients who could be evaluated; superiority &amp; non-inferiority</b> |                                                |                         |                               |                                 |                      |                                                                                                                                                                                                                                                                                                                                                                                                                                                                                                                                                                                                                                                                                                                                                                                                                            |  |
| CLINICAL ENDPOINTS                                                                                 | DAPT<br>n=4710                                 | PLACEBO + ASA<br>n=4649 | HAZARD RATIO<br>(95% CI)      | P-VALUE                         | NNT/NNH              |                                                                                                                                                                                                                                                                                                                                                                                                                                                                                                                                                                                                                                                                                                                                                                                                                            |  |
| GUSTO moderate or severe bleeding                                                                  | 2.5%                                           | 1.6%                    | 1.61 (1.21-2.16)              | 0.001<br>NS for non-inferiority | 112/30 MONTHS        |                                                                                                                                                                                                                                                                                                                                                                                                                                                                                                                                                                                                                                                                                                                                                                                                                            |  |
| <b>SECONDARY SAFETY ENDPOINTS: patients who could be evaluated</b>                                 |                                                |                         |                               |                                 |                      |                                                                                                                                                                                                                                                                                                                                                                                                                                                                                                                                                                                                                                                                                                                                                                                                                            |  |
| CLINICAL ENDPOINTS                                                                                 | DAPT<br>n=4710                                 | PLACEBO + ASA<br>n=4649 | RISK DIFFERENCE %<br>(95% CI) | P-VALUE                         | NNT/NNH<br>30 MONTHS |                                                                                                                                                                                                                                                                                                                                                                                                                                                                                                                                                                                                                                                                                                                                                                                                                            |  |
| GUSTO severe bleeding<br>intracranial bleed or hemodynamic compromise requiring intervention       | 0.8%                                           | 0.6%                    | 0.2 (-0.1-0.6)                | 0.15                            | -                    |                                                                                                                                                                                                                                                                                                                                                                                                                                                                                                                                                                                                                                                                                                                                                                                                                            |  |
| GUSTO moderate bleeding<br>transfusion, but hemodynamically stable                                 | 1.7%                                           | 1%                      | 0.7 (0.2-1.2)                 | 0.004                           | 143                  |                                                                                                                                                                                                                                                                                                                                                                                                                                                                                                                                                                                                                                                                                                                                                                                                                            |  |
| BARC Type 2, 3 or 5                                                                                | 5.6%                                           | 2.9%                    | 2.6 (1.8-3.5)                 | <0.001                          | 37                   |                                                                                                                                                                                                                                                                                                                                                                                                                                                                                                                                                                                                                                                                                                                                                                                                                            |  |
| BARC Type 2<br>overt, actionable bleed                                                             | 3.1%                                           | 1.5%                    | 1.5 (0.9-2.1)                 |                                 | 63                   |                                                                                                                                                                                                                                                                                                                                                                                                                                                                                                                                                                                                                                                                                                                                                                                                                            |  |
| BARC Type 3<br>overt bleed, ↓Hgb & transfusion                                                     | 2.6%                                           | 1.5%                    | 1.1 (0.6-1.7)                 |                                 | 91                   |                                                                                                                                                                                                                                                                                                                                                                                                                                                                                                                                                                                                                                                                                                                                                                                                                            |  |
| BARC Type 5 fatal bleed                                                                            | 0.15%                                          | 0.09%                   | 0.1 (-0.1-0.2)                | 0.38                            | -                    |                                                                                                                                                                                                                                                                                                                                                                                                                                                                                                                                                                                                                                                                                                                                                                                                                            |  |

In a separate analysis, the DAPT investigators evaluated extended DAPT in patients who had a **BMS** inserted.<sup>10</sup> The authors concluded there was no benefit or harm, but the study was underpowered.

**STRENGTHS, LIMITATIONS, & UNCERTAINTIES**

**STRENGTHS:**

- Largest randomized controlled trial assessing DAPT therapy beyond 1 year of stent placement.
- Clinically meaningful endpoints (stent thrombosis, MACCE [including death], bleeding) with ITT analysis for efficacy outcomes.
- Blinded adjudication of clinical outcomes (and unblinded, independent safety committee).
- Extended follow-up. Patients were followed for 3 months after discontinuation of their thienopyridine to assess for rebound ischemia. There was an increased risk of stent thrombosis & MACCE in both groups after discontinuation.
- Only ~5% of patients lost to follow-up.

**LIMITATIONS:**

- Only 43.6% (9961/22,866) of the enrolled participants who received a DES were randomized at 12 months. 11.5% (2638/22,866) had an event(s) during the first 12 months of therapy and approximately 2/3 (61%, 1620/2638) of these individuals required revascularization. 25.4% (5808/22,866) withdrew consent.
- Low risk compliant patient population, i.e. those who had an event (thrombosis, bleed, death) or were non-compliant were excluded from the randomization phase. Only 22% of the study population was on a proton-pump inhibitor at randomization.

**UNCERTAINTIES:**

- Benefits & risks in a higher-risk population
- Potential increase in non-cardiac deaths, e.g. cancer-related, fatal trauma
- Outcomes with other stent types or non-thienopyridine P2Y12 inhibitors (e.g. ticagrelor)
- **Difference in outcomes for 1<sup>st</sup> vs 2<sup>nd</sup> generation DES**
  - The risk of stent thrombosis is thought to be higher with 1<sup>st</sup> generation DES (e.g. paclitaxel, 27% of patient population). When these individuals were excluded for a post-hoc analysis, the difference in stent thrombosis between groups lessened (months 12-30: DAPT 0.23% vs placebo + ASA 0.72%, HR 0.33 [95% CI 0.15-0.72], p=0.004, ARR=0.49%, NNT=205).<sup>3</sup>

**RxFILES RELATED LINKS**

- Duration of DAPT & Triple Therapy RxFiles Chart
- **PCI-CLARITY** RxFiles Trial Summary: <http://www.rxfiles.ca/rxfiles/uploads/documents/PCI-CLARITY%20Trial%20Summary.pdf>
- **PCI-CURE** RxFiles Trial Summary: <http://www.rxfiles.ca/rxfiles/uploads/documents/PCI-CURE%20Trial%20Summary.pdf>
- **PLATO** RxFiles Trial Summary: <http://www.rxfiles.ca/rxfiles/uploads/documents/PLATO%20Trial%20Summary.pdf>
- **TRITON-TIMI** RxFiles Trial Summary: <http://www.rxfiles.ca/rxfiles/uploads/documents/TRITON-TIMI%2038%20Trial%20Summary.pdf>

♂=male ACS=acute coronary syndrome ARI=absolute risk increase ASA=acetylsalicylic acid BARC=Bleeding Academic Research Consortium criteria BMI=body mass index BMS=bare-metal stent CABG=coronary artery bypass graft CI=confidence interval CV=cardiovascular DAPT=dual antiplatelet therapy DES=drug-eluting stent DM=diabetes mellitus G<sub>1</sub>DES=1<sup>st</sup> generation DES GUSTO=Global Utilization of Streptokinase and Tissue Plasminogen Activator for Occluded Arteries criteria HF=heart failure HR=hazard ratio HTN=hypertension ITT=intention to treat LVEF=left ventricular ejection fraction MACCE=major adverse cardiovascular and cerebrovascular events (composite of death, MI, stroke) MI=myocardial infarction mos=months NNT=number needed to treat NNH=number needed to harm NS=non-statistically significant NSTEMI=non-ST elevated MI P2Y12 inhibitor=platelet receptor inhibitor PAD=peripheral artery disease PCI=percutaneous coronary intervention STEMI=ST elevated MI sx=surgery TIA=transient ischemic attack tx=treatment

**ACKNOWLEDGEMENTS:** Prepared By: L.Kosar, J. Walters, L Regier, B.Jensen

**DISCLAIMER:** The content of this newsletter represents the research, experience and opinions of the authors and not those of the Board or Administration of Saskatoon Health Region (SHR). Neither the authors nor Saskatoon Health Region nor any other party who has been involved in the preparation or publication of this work warrants or represents that the information contained herein is accurate or complete, and they are not responsible for any errors or omissions or for the result obtained from the use of such information. Any use of the newsletter will imply acknowledgment of this disclaimer and release any responsibility of SHR, its employees, servants or agents. Readers are encouraged to confirm the information contained herein with other sources. Additional information and references online at [www.RxFiles.ca](http://www.RxFiles.ca) Copyright 2016 – RxFiles, Saskatoon Health Region (SHR)

**References:**

- <sup>1</sup> Mauri L, Kereiakes DJ, Yeh RW, et al; **DAPT Study Investigators**. Twelve or 30 months of dual antiplatelet therapy after drug-eluting stents. *N Engl J Med*. 2014 Dec 4;371(23):2155-66.
- <sup>2</sup> Mauri L, Kereiakes DJ, Normand SL, et al. Rationale and design of the dual antiplatelet therapy study, a prospective, multicenter, randomized, double-blind trial to assess the effectiveness and safety of 12 versus 30 months of dual antiplatelet therapy in subjects undergoing percutaneous coronary intervention with either drug-eluting stent or bare metal stent placement for the treatment of coronary artery lesions. *Am Heart J*. 2010 Dec;160(6):1035-41.
- <sup>3</sup> Mauri L, Yeh RW, Kereiakes DJ. Duration of dual antiplatelet therapy after drug-eluting stents. *N Engl J Med*. 2015 Apr 2;372(14):1373-4.
- <sup>4</sup> Tanguay JF, Bell AD, Ackman ML, et al; **Canadian Cardiovascular Society**. Focused 2012 update of the Canadian Cardiovascular Society guidelines for the use of antiplatelet therapy. *Can J Cardiol*. 2013 Nov;29(11):1334-45.
- <sup>5</sup> Roffi M, Patrono C, Collet JP, et al. **2015 ESC Guidelines for the Management of Acute Coronary Syndromes in Patients Presenting Without Persistent ST-segment Elevation**. *Rev Esp Cardiol (Engl Ed)*. 2015 Dec;68(12):1125.
- <sup>6</sup> Amsterdam EA, Wenger NK, Brindis RG, et al; American College of Cardiology; American Heart Association Task Force on Practice Guidelines; Society for Cardiovascular Angiography and Interventions; Society of Thoracic Surgeons; American Association for Clinical Chemistry. **2014 AHA/ACC Guideline for the Management of Patients with Non-ST-Elevation Acute Coronary Syndromes: a report of the American College of Cardiology/American Heart Association Task Force on Practice Guidelines**. *J Am Coll Cardiol*. 2014 Dec 23;64(24):e139-228.
- <sup>7</sup> O'Gara PT, Kushner FG, Ascheim DD, et al; American College of Cardiology Foundation; American Heart Association Task Force on Practice Guidelines; American College of Emergency Physicians; Society for Cardiovascular Angiography and Interventions. **2013 ACCF/AHA guideline for the management of ST-elevation myocardial infarction: executive summary: a report of the American College of Cardiology Foundation/American Heart Association Task Force on Practice Guidelines: developed in collaboration with the American College of Emergency Physicians and Society for Cardiovascular Angiography and Interventions**. *Catheter Cardiovasc Interv*. 2013 Jul 1;82(1):E1-27.
- <sup>8</sup> Collet JP, Silvain J, Barthélémy O; **ARCTIC investigators**. Dual-antiplatelet treatment beyond 1 year after drug-eluting stent implantation (ARCTIC-Interruption): a randomised trial. *Lancet*. 2014 Nov 1;384(9954):1577-85.
- <sup>9</sup> Lee CW, Ahn JM, Park DW et al. Optimal duration of dual antiplatelet therapy after drug-eluting stent implantation: a randomized, controlled trial (**DES-LATE**). *Circulation*. 2014 Jan 21;129(3):304-12.
- <sup>10</sup> Kereiakes DJ, Yeh RW, Massaro JM, et al; Dual Antiplatelet Therapy (**DAPT**) Study Investigators. Antiplatelet therapy duration following **bare metal** or drug-eluting coronary stents: the dual antiplatelet therapy randomized clinical trial. *JAMA*. 2015 Mar 17;313(11):1113-21.

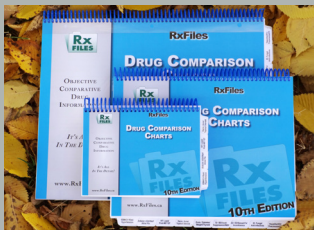

## Drug Comparison Charts 10th Edition

**Details That  
Matter**

~

**Objective &  
Evidence-based  
Drug Information**

[www.RxFiles.ca](http://www.RxFiles.ca)

**Rx  
FILES**

**There's an APP!**

**Follow Us:**  
*through email updates*

OR  
ON:

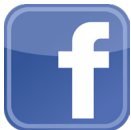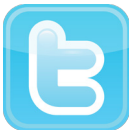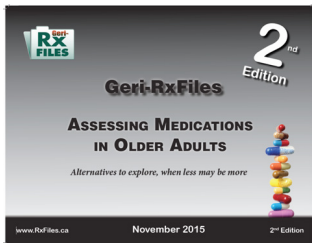

Supplement: DAPT_trial_summary.pdf [file DAPT_trial_summary.pdf]
